# Supplementary material
Source: publisher figshare collection journal article supplement (https://diabetesjournals.figshare.com/ndownloader/files/23734091)
Supplement: Supplementary file 1 [file 23734091]

## Supplemental figure 1

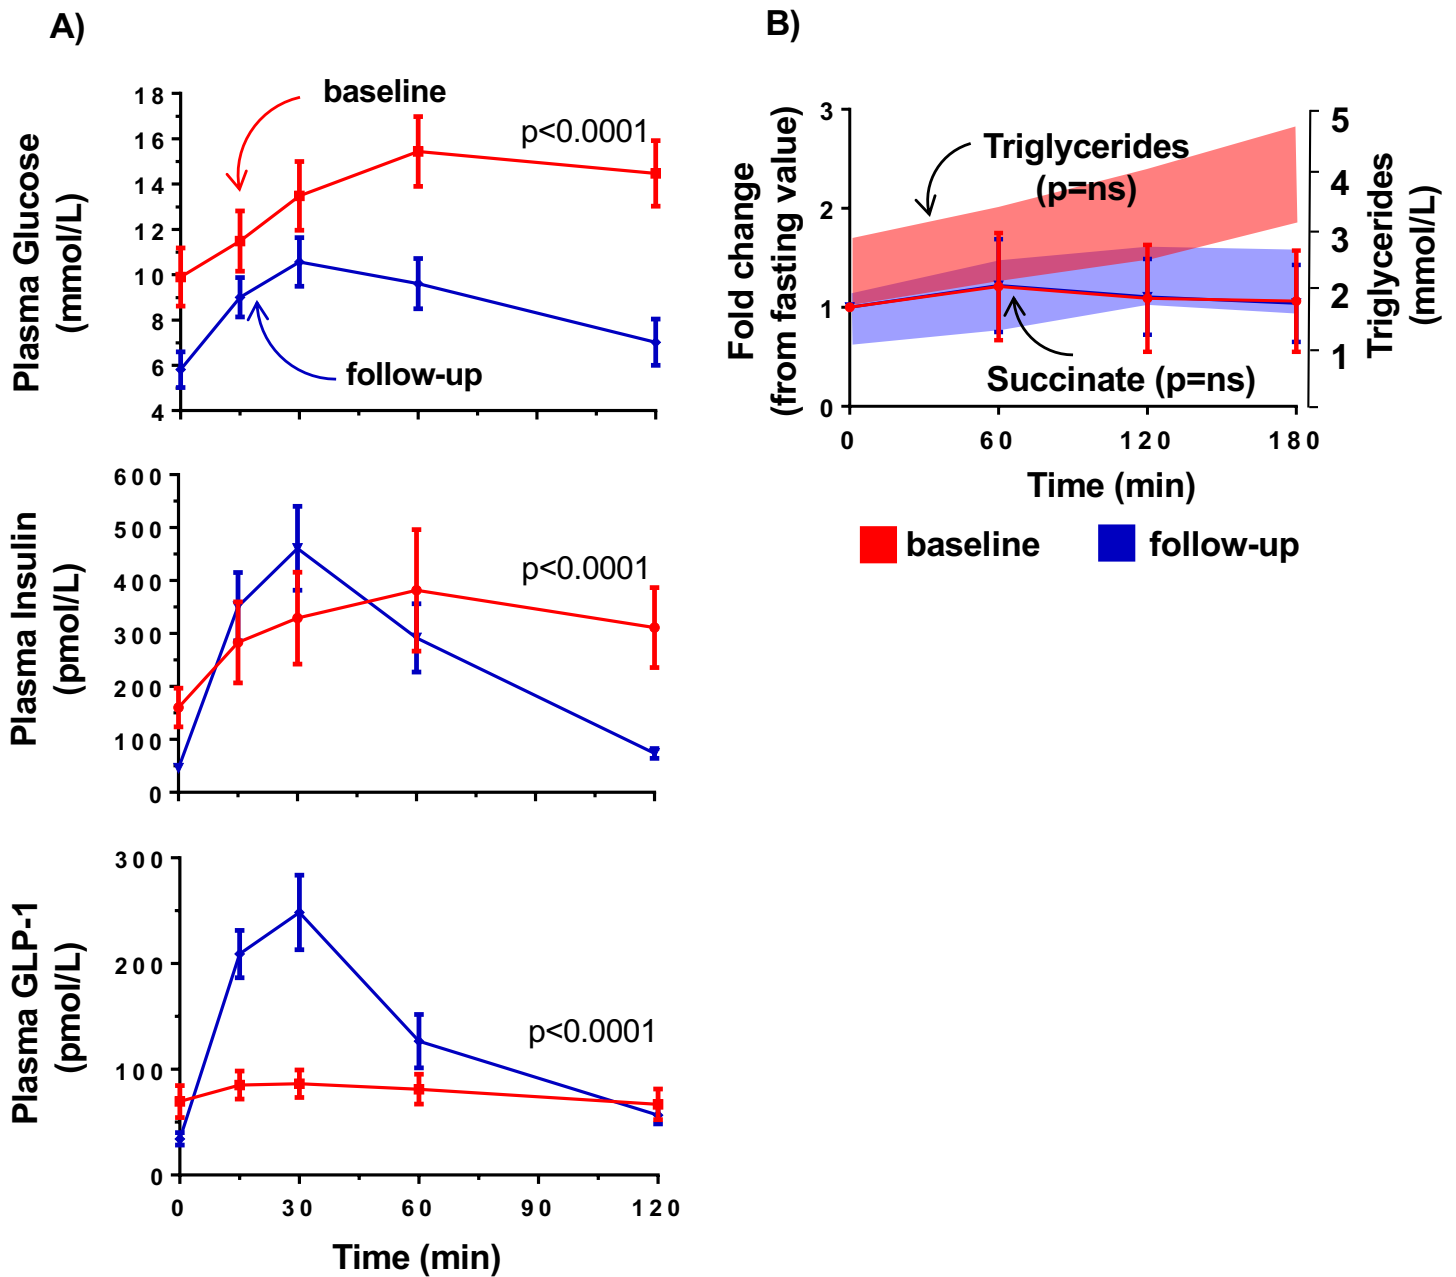

**Supplemental figure 1:** A) metabolic response of cohort II to an MTT. From the top to the bottom, the response of plasma glucose, insulin and GLP-1 to an MTT before and one year after bariatric surgery. B) succinate response of subjects from cohort II to a lipid test (LT). The shadow areas show triglycerides levels during LT, whereas the lines represent the values of plasma succinate. Data are mean  $\pm$  SD. Time-curves were compared using repeated measures ANOVA (p-values refer to the interaction between treatment and time).
